# Supplementary material
Source: Springer Nature journal article supplement (https://www.springermedizin.de/resource/supplementary/12936_2012_2449_MOESM5_ESM.pdf/9542758)

**B/A**

**A**

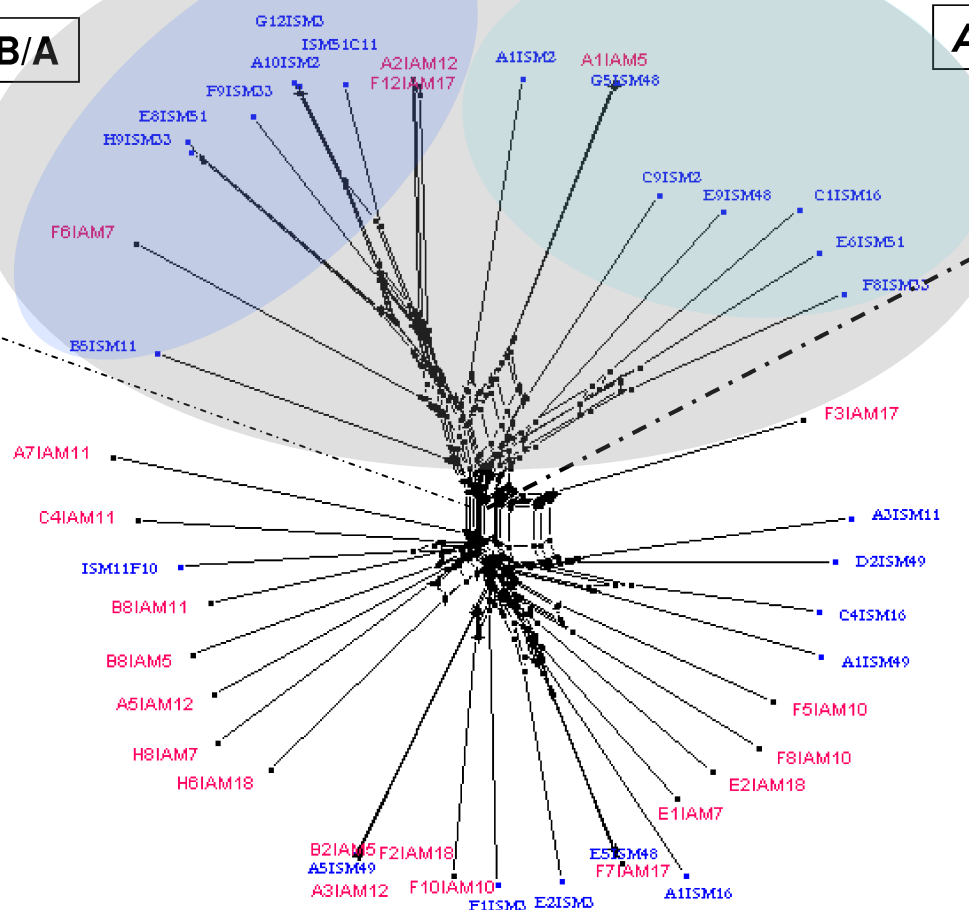

**B, B/C and C**

Supplement: MOESM5 [file 9542758]
